1

2 **On the advantages of low evolvability in fluctuating environments: could sex be the**  
3 **preadaptation for the stability-based sorting?**

4

5 Running title: Advantages of low evolvability

6

7 J. Flegr<sup>1</sup>, P. Ponížil<sup>2,3</sup>

8

9 <sup>1</sup> Department of Biology, Faculty of Science, Charles University in Prague, Viničná 7, 128 44 Prague,  
10 Czech Republic

11 <sup>2</sup> Department of Physics and Materials Engineering, Tomas Bata University in Zlin, Vavrečkova 275,  
12 760 01 Zlín, Czech Republic

13 <sup>3</sup> Center of Polymer Systems, Tomas Bata University in Zlin, 762 72 Zlin, Czech Republic

14

15

16 **Corresponding author:** Jaroslav Flegr, Faculty of Science, Viničná 7, 128 44 Prague, Czech  
17 Republic, email: [flegr@cesnet.cz](mailto:flegr@cesnet.cz), tel.: +(420) 221951821

18

19

20

21 **Keywords:** Evolvability; model; competition; stability-based sorting; sex; extinction; frozen  
22 plasticity; punctuated equilibrium.

23

24 **Abstract**

25 The ability of organisms to adaptively respond to environmental changes (evolvability) is usually  
26 considered to be an important advantage in interspecies competition. It has been suggested, however,  
27 that evolvability could be a double-edged sword that could turn into a serious handicap in fluctuating  
28 environments. The authors of this counterintuitive idea have published only verbal models to support  
29 their claims.

30 Here we present the results of individual-based stochastic modelling of competition between two  
31 asexual species differing only by their evolvability. They show that, in changeable environments, less  
32 evolvable species could outperform its more evolvable competitor in a broad area of a parameter  
33 space, regardless of whether the conditions fluctuated periodically or aperiodically. Highly evolvable  
34 species prospered better nearly all the time; however, they sustained a higher probability of extinction  
35 during rare events of rapid transient change of conditions.

36 Our results offer an explanation of why sexually reproducing species, with their reduced capacity to  
37 respond adaptively to environmental changes, prevail in most eukaryotic taxa in nearly all biotopes on  
38 the surface of Earth. These species often suffer several important disadvantages in direct competition  
39 with asexual species; however, they mostly win in changeable environments in the more important  
40 sorting-according-to-stability battle.

41

42

## 43 **Introduction**

44 Most of the eukaryotic organisms on Earth reproduce sexually, despite the existence of many obvious  
45 disadvantages, including two twofold costs of this complicated mode of reproduction (the cost of  
46 meiosis and the cost of males), of this complicated mode of reproduction (Otto, 2009). Many models  
47 and hypotheses have been published within the past 40 years to describe the conditions under which  
48 sexually reproducing organisms can outperform their asexual competitors, including asexual mutants  
49 (Bell, 1982; Maynard Smith, 1978). For most of these models (except, e.g., for the DNA repairing  
50 models (Horandl & Hadacek, 2013) or variants of Muller ratchet models (Kondrashov, 1982; Muller,  
51 1964)), such conditions are relatively special and occur only in certain ecological situations. At the  
52 same time, sexual reproduction is predominant in all groups of eukaryotic organisms regardless of  
53 their taxonomic position or ecological strategy (Charlesworth, 2006). Moreover, the obligate sex  
54 prevails in many taxa, despite the fact that it is nearly always outperformed by the facultative sex, the  
55 condition-dependent alternation of many rounds of asexual reproduction with a round or rounds of  
56 sexual reproduction (Bell, 1982; Green & Noakes, 1995).

57 An interesting verbal model explaining the origin and persistence of sexual reproduction was  
58 suggested by Williams (1975), in his seminal book *Sex and Evolution* pp. 145-146, 149-154, 169. He  
59 argued that, paradoxically, sexual species can take advantage of their lower ability to evolve. Due to  
60 the negative influence of segregation and recombination on the heritability of phenotypic traits and  
61 fitness, and due to the effect of gene flow, the ability of populations of sexual species to adapt to  
62 actual environmental conditions is lower in comparison with populations of asexual species.  
63 Therefore, populations of sexual species usually retain a large part of their genetic polymorphism,  
64 including alleles that are suboptimal under present local conditions. Such alleles usually persist in the  
65 population at low frequencies, but their presence can be extremely useful for the survival of the  
66 population and species when local conditions change.

67 It was also suggested recently that one of the important differences between asexual and  
68 sexual organisms is a much higher incidence of frequency-dependent selection (Flegr, 2010). Together  
69 with pleiotropy and epistasis, the presence of certain amount (possibly not too high amount) of alleles  
70 with such frequency dependent effects on fitness could stabilize the composition of the gene pool of a  
71 population, which would strongly decrease its ability responding to directional selection. One of the  
72 implications of this theory is that sexual species are favored in randomly or periodically fluctuating  
73 environments, i.e., in most environments on the surface of Earth, due to their lower evolvability. The  
74 stabilization of the composition of the gene pool not only prevents the population from the elimination  
75 of momentarily suboptimal alleles (Williams, 1975) but also decreases its ability to respond to  
76 selection, and by doing so, protects the population against an adaptation to transient changes in its  
77 environment (Flegr, 2013).

78           The counterintuitive idea of Williams, which can be in fact traced back to Darwin (Darwin,  
79 Barrett, & Freeman, 1987), has been theoretically studied by several authors in the context of the  
80 origin and maintenance of amphimixis, for review see (Kondrashov, 1993). The models show that  
81 under special conditions (special genetic architecture, alternating pure stabilizing and disruptive  
82 selection, etc.), the sexually reproducing organisms can outperform their asexual competitors (Gandon  
83 & Otto, 2007; Roughgarden, 1991). However, the character of environmental fluctuation favoring low  
84 evolvability has never been studied in detail. The aim of the present study is to test the validity of the  
85 verbal models of Williams (1975) and Flegr (2013) using a numeric individual-based stochastic  
86 model. Specifically, we searched for combinations of parameters under which the inability to  
87 adaptively respond to selection alone (not in the combination with amphimixis) is advantageous and  
88 may result in the victory of less evolvable species over its more evolvable competitor. In contrast to  
89 others, we studied the behavior of a model of competition between two asexual species: the more  
90 evolvable asexual species, which can freely respond to selection (plastic species), and the less  
91 evolvable asexual species, whose members are penalized for deflecting from its original phenotype  
92 (elastic species). This allows us to distinguish whether the species overran its competitor due to its  
93 evolutionary passivity alone or due to other advantages of sexuality, such as its higher genetic  
94 polymorphism – the existence of a stock of potentially useful alleles.

95

## 96 **Methods**

### 97 *Model*

98 The time in our stochastic, individual-based model is discrete, i.e., all births and deaths and  
99 environmental changes happen simultaneously, and is measured in generations. In each generation  
100 individuals propagate with a given probability and died with another probability. Therefore, each  
101 generation can be considered as one reproduction period of a species. We used this model for studying  
102 the competition of two species, plastic and elastic asexual species, living in an unstructured  
103 environment characterized by one (periodically or aperiodically fluctuating) environmental variable  
104  $E_{env}$ , e.g., temperature. In the periodically fluctuating environment, the current temperature, and at the  
105 same time the optimal temperature for an organism to be adapted to,  $E_{env}$ , is represented by a sinusoid  
106 that is characterized by its amplitude  $A$  and period  $T$ . Fig. 1a shows the  $E_{env}$  curve (red line) for  
107 amplitude 1.3 and period 500. The aperiodic conditions are described by a stochastic curve with  
108 particular amplitude  $A$ , generated by randomly adding or subtracting the constant increment  $\Delta E$   
109 to/from  $E_{env}$  with probability  $P_E$  per generation. Here, the rate of the environmental change is  
110 characterized by the pseudoperiod  $T$  (determined by the combination of  $\Delta E$  and  $P_E$ ), which is  
111 numerically equal to such a period  $T$  of the periodic model, for which the average speed of  $E_{opt}$  change

112 from  $-A$  to  $A$  is the same for both models. The value of  $\Delta E$  was fixed to 0.2 and  $P_E$  for each  
113 pseudoperiod was computed in advance by the Monte Carlo method. The value of  $E_{env}$  is bounded –  
114 when after an increment, it would exceed  $A$  (or fall below  $-A$ ), it is reset to  $A$  (or  $-A$ ). Fig. 2a shows a  
115 stochastic curve  $E_{env}$  (red line) with amplitude 1.2,  $\Delta E = 0.2$ , and  $P_E = 0.2$ . For both periodical and  
116 aperiodical conditions, the changes of temperature are either continuous (the change of  $E_{env}$   
117 immediately affects the organisms) or punctuational (the intrinsic continuous change of  $E_{env}$  manifests  
118 itself with probability  $P_m$  per generation, see Figs. 1b and 2b for  $P_m = 0.1$ ).

119 The size of the populations of both plastic and elastic species are independently density-  
120 regulated by a turbidostatic mechanism (Flegr, 1994). Namely, the probability of the death of an  
121 individual,  $P_u$ , is  $k_4 N^2 + k_5$ , where  $k_5$  is the probability of dying due to senescence or due to accident  
122 (density-independent component of mortality),  $N$  is the number of individuals of a particular species,  
123 and  $k_4$  is the probability of death due to a density-dependent process, e.g., due to contracting a directly  
124 transmitted parasite, the event probability of which increases with the square of  $N$  (Flegr, 1997). In our  
125 simulation experiments, we set  $k_4 = 5 \cdot 10^{-9}$  (which corresponds to a maximum equilibrium population  
126 10 000), and  $k_5 = 0.1$ . The phenotype of each individual is characterized by a single parameter  $E$ ,  
127 reflecting its body temperature (and therefore also indirectly the optimum temperature to live in). In  
128 each generation, any individual can either die (with probability  $P_u$ ), reproduce (with probability  $P_n$ ), or  
129 do nothing (with probability  $1 - P_u - P_n$ ). When a particular organism reproduces, its descendant either  
130 inherits the parental phenotype  $E$  or (with probability  $P_x = 0.1$ ) mutates, i.e., its  $E$  increases or  
131 decreases by 0.05. The probability of reproduction of a member of plastic and elastic species is

132

133

$$134 \quad P_{np} = k_1 (1 - k_2 |E - E_{env}|^{m_2})$$

135

136

137 and

138

139

$$140 \quad P_{ne} = k_1 (1 - k_2 |E - E_{env}|^{m_2} - k_3 |E - E_{orig}|^{m_3}),$$

141

142

143 respectively. The probabilities of reproduction were bounded – when it would fall below 0, it is reset  
144 to 0.  $k_1$  is the probability of reproduction under ideal conditions, i.e., when the temperature optimum of  
145 a particular individual corresponds to the actual temperature and this temperature corresponds to the  
146 temperature existing at the time of the origin of the species  $E = E_{env} = E_{orig}$ .  $k_2$  and  $m_2$  characterize the  
147 penalty for the deviation of the phenotype of an individual from the current temperature  $E_{env}$ , i.e., for  $E$   
148  $\neq E_{env}$ , and  $k_3$  and  $m_3$  characterize the penalty (paid by elastic species only) for the deflection of the  
149 current phenotype of an individual from the original phenotype (Flegr, 2013). In our model, the  $E_{orig} =$   
150  $E_{env} = 0$  at the start of our simulation experiment, and the penalty was positively correlated with the  
151 squared difference between  $E$  and  $E_{orig}$ . The existence of this second penalty is the only difference  
152 between elastic and plastic species, and this part of the equation is responsible for the elastic nature of  
153 evolutionary responses of sexual species. In the presented simulations, we set  $k_1=k_2=1$ ,  $k_3=0.6$ ,  
154  $m_2=m_3=2$ .

155 In the present model, the low evolvability of one of the competing species was ensured by  
156 introducing a penalty for the deviation of the phenotype of an individual from its original phenotype.  
157 We can imagine, for example, that adapting the body temperature to a value that better corresponds to  
158 the new environmental conditions could decrease the amount of energy needed for thermoregulation.  
159 However, it could also impair the functions of thousands of enzymes adapted to the original body  
160 temperature. The evolutionary passivity of a species could also be ensured, for example, by setting its  
161 mutation rate to 0; however, such a model is not biologically realistic. In contrast, the evolutionary  
162 elasticity of real species that is based on penalization for the deviation of the phenotype of an  
163 individual from its original phenotype has been supported by both theoretical models and empirical  
164 data, for review see (Flegr, 2010).

165

### 166 ***Implementation of the model***

167 The model is programmed as a modular web application in the PHP language. The parameters are  
168 entered via a web form. At the start of the simulation, the time series of  $E_{env}$  is computed in AWK, the  
169 interpreted programming language that can use nearly any function for computing time. The computer  
170 time demanding part of the program, namely the individual-based simulation of population processes,  
171 are written in C. Numerical results are visualized using gnuplot. The web application for the  
172 simulation of competition that can show 1) the course of one simulation experiment and 2) aggregate  
173 results for N repeated simulation experiments performed with the same parameters is available at  
174 <http://fyzika.ft.utb.cz/eng/index.php>.

### 175 ***Procedure***

176 Three hundred individual simulation experiments were performed for all combinations of amplitude  
177 and period (or pseudoperiod for aperiodic changes) for all 4 models ( $A$ : 20-980, step 60,  $T$ : 0.8-4.0).  
178 Each run was terminated after 10,000 generations or when one of the species went extinct. The  
179 numbers of plastic species and elastic species extinctions was compared with a two-sided Pearson's  
180 Chi-squared test (goodness of fit test). The parameter space was divided into four areas as shown in  
181 figures 3-7: the green area where the evolutionarily elastic species wins significantly more often ( $p <$   
182  $0.05$ ), the red area where the evolutionarily plastic species wins significantly more often, the gray area  
183 where the difference in both species surviving was not significant, and the white area where both  
184 species usually survive until the end of the simulation experiment, i.e., for 10,000 generations.

## 185 **Results**

186 We studied the extinction times of evolutionarily plastic and evolutionarily elastic organisms under  
187 conditions of both periodically (Fig. 1) and aperiodically (Fig. 2) changing environments. Under both  
188 conditions, the result of competition depended on the rate of changes and on the magnitude of the  
189 changes.

190 The results of the simulation for continuous periodic changes showed that under conditions of  
191 moderately-sized changes, or under conditions of rapid changes, the elastic species won significantly  
192 more often than the evolutionarily plastic species. On the other hand, the evolutionarily plastic species  
193 won when the changes were slow and the size of change was large, see Figs. 3-7. The evolutionarily  
194 plastic species also won in a second small region of the period-amplitude parameter space, namely for  
195 the periods 10-130 and the amplitudes 2.9-3.1, see Figure 7.

196 For the combination of parameters used in our simulation, aperiodic conditions favored plastic  
197 species for amplitudes larger than 1.5, compare Fig. 3 and 5. In contrast, discontinuous changes (Fig. 4  
198 and Fig. 6) somewhat favored the elastic species. The size of the elastic species-winning area of the  
199 period-amplitude parameter space was slightly larger and its position and shape differed (see the  
200 Discussion).

## 201 **Discussion**

202 Our results confirmed that, under fluctuating environmental conditions, the evolutionary passivity of  
203 species with low evolvability, namely their limited ability to respond to selection, could provide them  
204 with an advantage when competing with more evolvable species in a broad area of parameter space.  
205 Under such conditions, the evolutionarily passive species had a lower risk of extinction. This  
206 advantage was slightly higher when the environmental conditions fluctuated periodically and  
207 discontinuously.

208           At face value, this result might seem rather counterintuitive. In our model, the members of the  
209 evolutionarily passive (in our model elastic) species differed from the members of the evolutionarily  
210 plastic species only by the existence of a penalty that they had to pay for a deviation of their  
211 phenotype from the phenotype that they had at the start of each simulation run. Specifically, the size of  
212 the penalty (a decrease of the probability of reproduction in a particular time step) was directly  
213 proportional to the square of this deviation. Due to this term, the evolutionarily passive species  
214 responded to selection pressure elastically and therefore only partially. It could adaptively respond to  
215 small changes in environmental conditions, but not to large ones.

216           The elastic species expressed lower risk of extinction than the plastic species in a part of  
217 parameter space (the green area) because the population of the plastic species adapted from time to  
218 time to transiently changed conditions and it was not able to readapt quickly enough when the  
219 conditions returned to or overshot the norm. On the contrary, the phenotype of members of  
220 evolutionarily elastic species did not deviate from their original phenotype too much. Carriers of  
221 “adaptive” mutations were rewarded for the phenotype that was better suited to their actual  
222 environment. However, at the same time they were penalized for deviation of their phenotype from its  
223 original status (from the phenotype that they had immediately after speciation in real species and from  
224 the phenotype that they had had at the beginning of the simulation runs in our “in silico” conditions).  
225 The sharp boundary between the green and red areas around the amplitude 1.5 existed for all but very  
226 quickly periodically changing environments because the elastic species can survive only for a very  
227 short time once  $E$  minus  $E_{orig}$  is greater than about 1.5 – for larger differences, the mean birth rate is  
228 always smaller than the mean death rate. When the environmental changes were periodical and  
229 continuous, the elastic species outperformed plastic species in a broad interval of rate of environmental  
230 change (periods 100-860) when the size of environmental changes was relatively small (amplitude 1.1-  
231 1.5), and also when the size of environmental changes were moderate and large (the amplitude 1.5-2.8)  
232 and the rate of changes was large, namely the period was in a relatively narrow interval 100-180. In  
233 the later part of the elastic species-winning area (the green high periodicity tail) the mean phenotype of  
234 the plastic species increased or decreased strongly and settled down rather close to one of the  
235 boundaries of the fluctuation interval. In contrast, the mean phenotype of the elastic species did not  
236 change and remained close to  $E_{orig}$ . In consequence, the plastic species had slightly larger fluctuations  
237 in abundance, which sooner or later led to its extinction. Under conditions of aperiodic and also  
238 discontinuous changes, the green high periodicity tail of the elastic species-winning area was absent.  
239 In the white area of no statistical difference above the green tail, the fluctuations of the plastic species  
240 were too small to cause extinction, so both species survived. In the grey area, both species went extinct  
241 very quickly and did not survive the first environmental fluctuation. The evolutionarily plastic species  
242 usually won in slowly changing environment, especially when the changes were large (amplitudes >



243 1.6). In periodically fluctuating environment, the amplitude that was most favorable for the plastic  
244 species was about 1.6, and the resistance to the increase of the amplitude raised with the size of the  
245 period, i.e., the plastic species significantly outperformed the elastic species when the rate of change  
246 was slow enough, e.g., when the period was at least 980, even when the amplitude was as large as 4.  
247 Optically, the size of the main part of the plastic species-winning area is large. However, it must be  
248 emphasized that in this region both species usually go extinct during the first period of environmental  
249 change (the elastic species earlier). It is therefore questionable how (or whether) this combination of  
250 parameters is biologically relevant. The plastic species also won when the changes were very fast (the  
251 period or pseudoperiod was 10-110) and the size of changes was large but not maximum (amplitude  
252 2.9-3.1), Fig. 7. Under these conditions, the carriers of adaptive mutations outperformed other  
253 members of plastic (and also elastic) species; however, the number of carriers of standard phenotypes  
254 remained relatively high at the moments when the environmental conditions returned. This probably  
255 saved the plastic species from extinction. In the red bulk of this smaller part of the plastic species-  
256 winning area, the phenotypes of both species were close to  $E_{orig}$ . Both populations declined rapidly and  
257 fluctuated at a low level. Typically, the population of the plastic species was a bit smaller and  
258 vanished first. In the left-sided tail of the red bulk (e.g. for  $A = 2.7$ ,  $T = 10$ ), mean phenotypes of both  
259 species varied very little. Population sizes both increased and then decreased in synchrony, but the  
260 elastic species usually went extinct a little bit earlier than the plastic one. It probably happened when  
261 the mean phenotype of the elastic species finally changed a bit, either due to selection or due to drift  
262 when the population size decreased to a very low value. When the conditions fluctuated aperiodically,  
263 the amplitude most favorable for the plastic species was  $> 1.8$ ; for these amplitudes, the plastic species  
264 outperformed the elastic species even when the rate of change was very large (pseudoperiod  $> 20$ ).

265 During all simulations, the evolutionarily plastic species outperformed and therefore  
266 outnumbered the elastic species most of the time. However, in rarely occurring situations, e.g., when  
267 the conditions changed unusually strongly and rapidly in a non-periodically fluctuating environment or  
268 when many adaptive mutants appeared unusually early in a periodically fluctuating environment, the  
269 plastic species was reduced to zero or to a very small value. In very small populations, genetic drift  
270 (i.e., chance), rather than fitness, determines the destiny of individuals. Also, the number of arising  
271 mutations is too low there. Therefore, any small population, including the population of plastic  
272 species, loses the ability to adaptively respond to changes in its environment.

273 It is important to emphasize that we modeled the competition of two species that did not  
274 directly interact ecologically, for example, two species that did not exploit any common resource or  
275 that lived in separate areas. When, for any reason, the population of the first species increased  
276 (decreased), the situation of the second species was not influenced by this. Therefore, the subject this  
277 study are macroevolutionary or macroecological phenomena, namely the sorting of species or

278 populations on the basis of stability (stability-based sorting), rather than intrapopulation phenomena.  
279 In principle, we modeled a situation in which plastic and elastic species were introduced 300 times to  
280 two identical isolated islands and then counted how many times each species survived longer on its  
281 private islands. If direct competition was permitted, e.g., when growth of the populations of both  
282 species is affected by the same parasite ( $P_u = k_d (N_p + N_e)^2$ ), the result of our simulation was different.  
283 Under such conditions, the plastic species outperformed the elastic species in the whole parameter  
284 space (results not shown). Competition without any direct ecological interaction operates in many  
285 groups of organisms. For example, genetically different lineages of parasites as well as different  
286 parasitic species rarely meet in one host even during situations when they live in the same area  
287 (Morand, Poulin, Rohde, & Hayward, 1999). The same also holds for species that exploit various  
288 temporary habitats like forest openings, puddles, rotting fruits or animal and plant remains. Indirect  
289 competition, however, also plays an extremely important role in species with “normal” ecology. Over  
290 long timescales, most habitats on Earth are unstable. Particular localities come and go, old localities  
291 turn uninhabitable for particular species and new inhabitable localities originate. When a species  
292 colonizes a new suitable locality, its population is at least transiently liberated from its competitors.  
293 Frequently, on long-term time scales, the species that are weak direct competitors can win when they  
294 are able to quickly colonize new suitable locations and there produce many new colonists before their  
295 stronger competitors arrive and outcompete them, or before their locations cease to exist. Actually, the  
296 low growth rate of weak competitors can be the very reason for their final victory because it can help  
297 them to escape overexploitation of their resources, which can help them to keep their environment  
298 (e.g. the host organism in the case of parasitic species) inhabitable for a longer time.

299         When not only rapid fluctuations but also some slow and systematic (unidirectional) change  
300 occurs in a particular environment in the real world, and when the plastic species succeeds in  
301 surviving the fluctuations long enough, the plastic species would finally win over its elastic  
302 competitor. The penalty paid by elastic species for its out-of-date phenotype grows with the systematic  
303 change of the environment until it turns incompatible with the survival of the species. Before it  
304 happens, however, the elastic species could speciate, and the new species could transiently turn plastic  
305 and therefore acquire the ability to adapt to changed conditions (Carson, 1968; Flegr, 2010; Mayr,  
306 1954; Templeton, 2008). After such an “evolutionary reset”, the new species returns to elasticity (by  
307 slow accumulation of genetic polymorphism, especially by the accumulation of mutations with a  
308 frequency-dependent effect on fitness). The new elastic species will probably outcompete the old and  
309 obsolete elastic species (Pearson, 1998), and the competition between the plastic species and new  
310 elastic species can continue (Flegr, 2013).

311         In comparison with real systems, our model favors the plastic species in two important  
312 aspects. First, in real organisms, the fitness of an individual is determined by several traits rather than

313 just one as it is in our model. Moreover, each trait is usually determined or influenced by many genes,  
314 the effects of which are often not additive (Griffiths & Neumann-Held, 1999). In such a  
315 multidimensional adaptive landscape, the rapid adaptation of plastic species to the drastic (rapid and  
316 large) changes of an environment is probably much more difficult than in the unidimensional adaptive  
317 landscape that is the subject of our simulations. The difficulty of quick return to the original phenotype  
318 probably grows with the number of dimensions, and it is even possible that the plastic species could  
319 finish trapped, or at least transiently trapped, in a certain location of the adaptive landscape (Schwartz,  
320 2002).

321         Second, in real systems, the evolutionary passivity and elasticity of species is mostly the  
322 consequence of their sexual reproduction. Therefore, in sexual species, evolutionary passivity is  
323 accompanied by the persistence of a large amount of genetic polymorphism that can be sustained in  
324 the population by various mechanisms related to sex (Burger, 1999; Waxman & Peck, 1999). For  
325 example, in sexual species, the fixation of genotypes adapted to local conditions and the extinction of  
326 locally maladapted genotypes is very slow or even impossible due to segregation and recombination,  
327 as well as due to gene flow, the hybridization of members of a local population with migrants (Dias &  
328 Blondel, 1996; Haldane, 1956). Moreover, sexual species can sustain their diploid status (Lewis &  
329 Wolpert, 1979) and therefore can maintain a lot of genetic polymorphism in their gene pool by the  
330 heterozygote advantage effect, which represents a special type of frequency dependent selection. In  
331 our model, both plastic and elastic species reproduce asexually, and thus they have comparable  
332 amounts of genetic polymorphism in their gene pools. Therefore, the elastic species in our model is  
333 deprived of its largest advantage – the ability to very quickly (although only transiently and only  
334 imperfectly) respond to rapid changes by shifting frequencies of already existing (old) alleles. In  
335 contrast to a real situation, the rate of response to changes is similar in elastic and plastic species at the  
336 beginning of our simulations (as it was mostly fueled by rare mutations) and slows down in the elastic  
337 species as its phenotype declines from its original state. However, our present results suggest that even  
338 when elastic species are stripped of this crucial advantage, they can outcompete the plastic species in a  
339 broad area of parameter space. Evolutionary passivity alone, without the usually accompanying higher  
340 polymorphism resulting in quicker evolutionary response to new selective pressure, can explain the  
341 superiority of sexual species under fluctuating environmental conditions.

342         In our model, the elastic species was identically penalized for positive and negative divergence  
343 from zero. Moreover, the environmental condition,  $A_{env}$ , fluctuated symmetrically around zero.  
344 Nothing of this probably holds true in real systems. Being adapted to different than mean conditions  
345 (e.g. mean temperature) strongly penalizes the elastic species, while asymmetry in fluctuation of  $A_{env}$   
346 (difference in sizes of positive and negative amplitudes, in time spent above and below zero, and in

347 rates of decreasing and increasing of  $A_{env}$ ) most probably brings further advantages for the elastic  
348 species in more realistic situations.

349 Typically, a positive correlation between the probability of local extinction and global  
350 extinction exists (Payne & Finnegan, 2007). Therefore, a decreased probability of extinction in a  
351 fluctuating environment could be advantageous not only on an ecological time scale, but also in  
352 macroevolution. In agreement with the verbal arguments of G.C. Williams (1975), our results show  
353 that a possible reason for the long-term success of sexual species may be, paradoxically, their lower  
354 evolutionary plasticity (lower evolvability), which reduces the risk of extinction of the population or  
355 species in an environment with randomly or periodically fluctuating conditions. This means that  
356 sexual reproduction might not be the evolutionary adaptation that increases some aspect of direct or  
357 inclusive fitness of its carriers, as it is suggested by most present theories on the origin of sex. Sex  
358 could rather be the evolutionary exaptation (Gould, 2002; Gould & Lewontin, 1979) that increases the  
359 chances of a given species and evolutionary lineages in the process of stability-based sorting and in the  
360 process of species selection (Vrba & Gould, 1986).

361

### 362 **Acknowledgements**

363 Computational resources were provided by the CESNET LM2015042 and the CERIT Scientific Cloud  
364 LM2015085, provided under the programme "Projects of Large Research, Development, and  
365 Innovations Infrastructures. The authors' work was supported by the Grant Agency of the Czech  
366 Republic (Grant No. P303/16/20958), Charles University of Prague (grant UNCE 204004) and the  
367 Ministry of Education, Youth and Sports of the Czech Republic – Programme NPU I (LO1504). We  
368 would like to thank Charlie Lotterman for his help with the final version of the paper, and three  
369 anonymous referees and the editor of *Axios Review Society* for their extremely useful suggestions.

370

371

372 **References**

373

374 Bell, G. (1982). *The masterpiece of nature: the evolution and genetics of sexuality*. Berkeley:  
375 University of California Press.

376 Burger, R. (1999). Evolution of genetic variability and the advantage of sex and recombination in  
377 changing environments. *Genetics*, 153(2), 1055-1069.

378 Carson, H. L. (1968). The population flush and its genetic consequences. In R. C. Lewontin (Ed.),  
379 *Population Biology and Evolution* (pp. 123-137). Syracuse: Syracuse University Press.  
380 (Reprinted from: IN FILE).

381 Darwin, C., Barrett, P. H., & Freeman, R. B. (1987). *The works of Charles Darwin*. New York: New  
382 York University Press.

383 Dias, P. C., & Blondel, J. (1996). Local specialization and maladaptation in the Mediterranean blue tit  
384 (*Parus caeruleus*). *Oecologia*, 107, 79-86.

385 Flegr, J. (1994). Chemostat-turbidostat discontinuum, r-K continuum and population-size regulating  
386 mechanism. *Acta Societatis Zoologica Bohemica*, 58, 143-149.

387 Flegr, J. (1997). Two distinct types of natural selection in turbidostat-like and chemostat-like  
388 ecosystems. *Journal of Theoretical Biology*, 188, 121-126.

389 Flegr, J. (2010). Elastic, not plastic species: frozen plasticity theory and the origin of adaptive  
390 evolution in sexually reproducing organisms. *Biology Direct*, 5, 2.

391 Flegr, J. (2013). Microevolutionary, macroevolutionary, ecological and taxonomical implications of of  
392 punctuational theories of adaptive evolution. *Biology Direct*, 8, 1.

393 Gandon, S., & Otto, S. P. (2007). The evolution of sex and recombination in response to abiotic or  
394 coevolutionary fluctuations in epistasis. *Genetics*, 175, 1835-1853.

395 Gould, S. J. (2002). *The Structure of Evolutionary Theory*. Cambridge: The Belknap Press of Harvard  
396 University Press.

397 Gould, S. J., & Lewontin, R. C. (1979). The spandrels of San Marco and the Panglossian paradigm: a  
398 critique of the adaptationist programme. *Proc R Soc Lond B Biol Sci*, 205, 581-598.

399 Green, R. F., & Noakes, D. L. (1995). Is a little bit of sex as good as a lot? *Journal of Theoretical*  
400 *Biology*, 174, 87-96.

401 Griffiths, P. E., & Neumann-Held, E. M. (1999). The many faces of the gene. *BioScience*, 49, 656-  
402 662.

403 Haldane, J. B. S. (1956). The relation between density regulation and natural selection. *Proceedings of*  
404 *the Royal Society of London Series B-Biological Sciences*, 145, 306-308.

405 Horandl, E., & Hadacek, F. (2013). The oxidative damage initiation hypothesis for meiosis. *Plant*  
406 *Reproduction*, 26(4), 351-367. doi: 10.1007/s00497-013-0234-7

407 Charlesworth, B. (2006). The evolutionary biology of sex. *Current Biology*, 16, R693-R695.

- 408 Kondrashov, A. S. (1982). Selection against harmful mutations in large sexual and asexual  
409 populations. *Genetical Research*, 40(3), 325-332.
- 410 Kondrashov, A. S. (1993). Classification of Hypotheses on the Advantage of Amphimixis. *Molecular*  
411 *Biology and Evolution*, 10, 1396-1401.
- 412 Lewis, J., & Wolpert, L. (1979). Diploidy, evolution and sex. *Journal of Theoretical Biology*, 78, 425-  
413 438.
- 414 Maynard Smith, J. (1978). *The evolution of sex*. Cambridge: Cambridge University Press.
- 415 Mayr, E. (1954). Change of genetic environment and evolution. In E. B. Ford, J. Huxley & A. C.  
416 Hardy (Eds.), *Evolution as a Process* (pp. 157-180). Princeton: Princeton University Press.  
417 (Reprinted from: IN FILE).
- 418 Morand, S., Poulin, R., Rohde, K., & Hayward, C. (1999). Aggregation and species coexistence of  
419 ectoparasites of marine fishes. *International Journal for Parasitology*, 29, 663-672.
- 420 Muller, H. J. (1964). The relation of recombination to mutational advance. *Mutation Research*, 1, 2-9.
- 421 Otto, S. P. (2009). The Evolutionary Enigma of Sex. *American Naturalist*, 174, S1-S14.
- 422 Payne, J. L., & Finnegan, S. (2007). The effect of geographic range on extinction risk during  
423 background and mass extinction. *Proceedings of the National Academy of Sciences of the*  
424 *United States of America*, 104, 10506-10511.
- 425 Pearson, P. N. (1998). Speciation and extinction asymmetries in paleontological phylogenies: evidence  
426 for evolutionary progress? *Paleobiology*, 24, 305-335.
- 427 Roughgarden, J. (1991). The evolution of sex. *American Naturalist*, 138(4), 934-953. doi: Doi  
428 10.1086/285261
- 429 Schwartz, J. (2002). Population genetics and sociobiology - conflicting views of evolution.  
430 *Perspectives in Biology and Medicine*, 45, 224-240.
- 431 Templeton, A. R. (2008). The reality and importance of founder speciation in evolution. *BioEssays*,  
432 30, 470-479.
- 433 Vrba, S., & Gould, S. J. (1986). The hierarchical expansion of sorting and selection: Sorting and  
434 selection cannot be equated. *Paleobiology*, 12, 217-228.
- 435 Waxman, D., & Peck, J. R. (1999). Sex and adaptation in a changing environment. *Genetics*, 153(2),  
436 1041-1053.
- 437 Williams, G. C. (1975). *Sex and evolution*. Princeton: Princeton University Press.
- 438
- 439
- 440

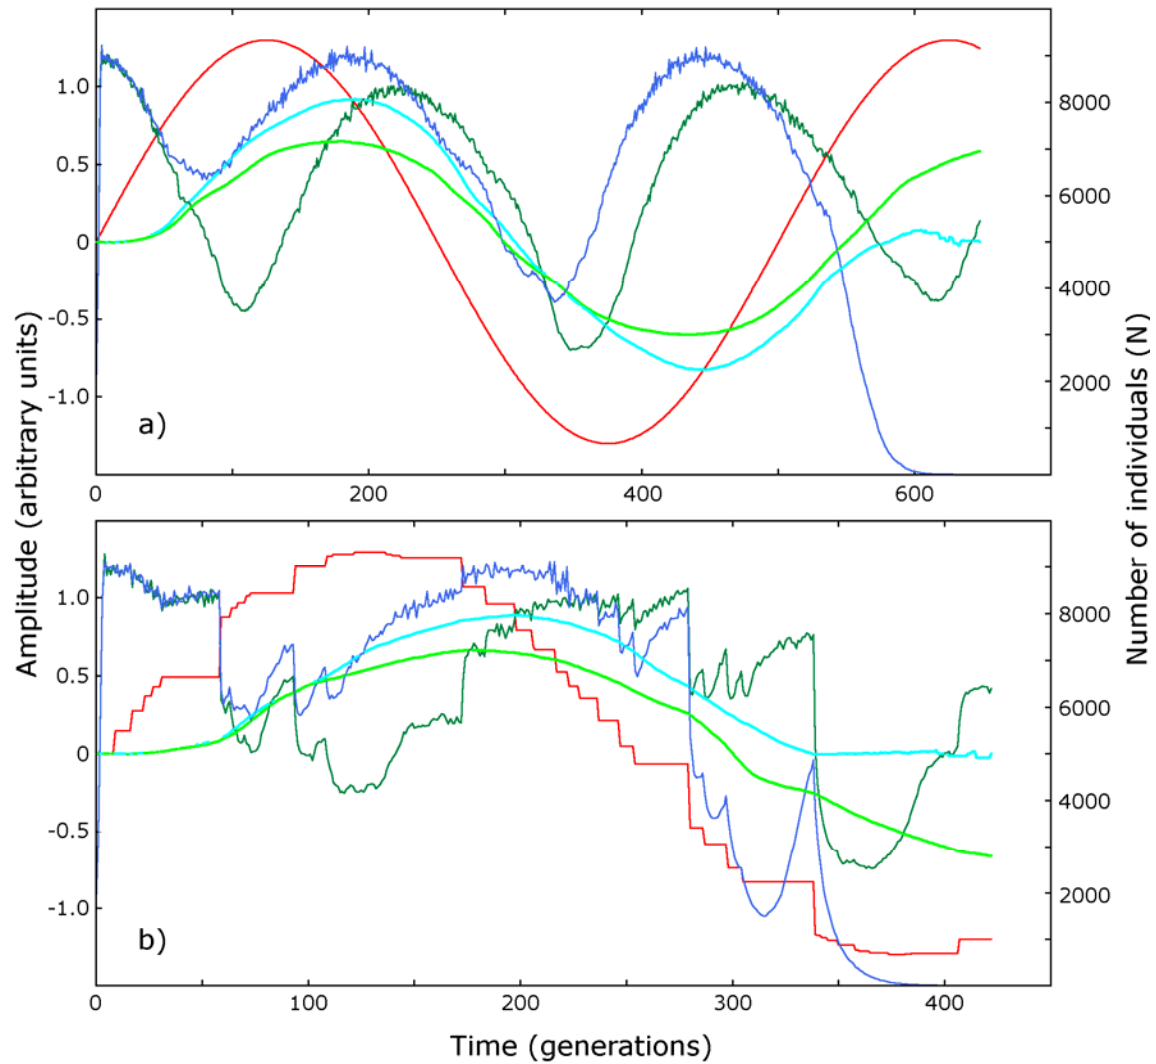

441

442

443 Fig. 1 Competition of evolutionarily plastic and elastic species under periodically changing conditions

444 The conditions (the variable temperature - the red line) changes either continuously (the upper part  
445 a) or discontinuously (lower part b). The dark blue, dark green, turquoise and light lines show the size  
446 of plastic species, size of elastic species, mean phenotype ( $E$ ) of elastic species and mean phenotype  
447 of plastic species, respectively.

448

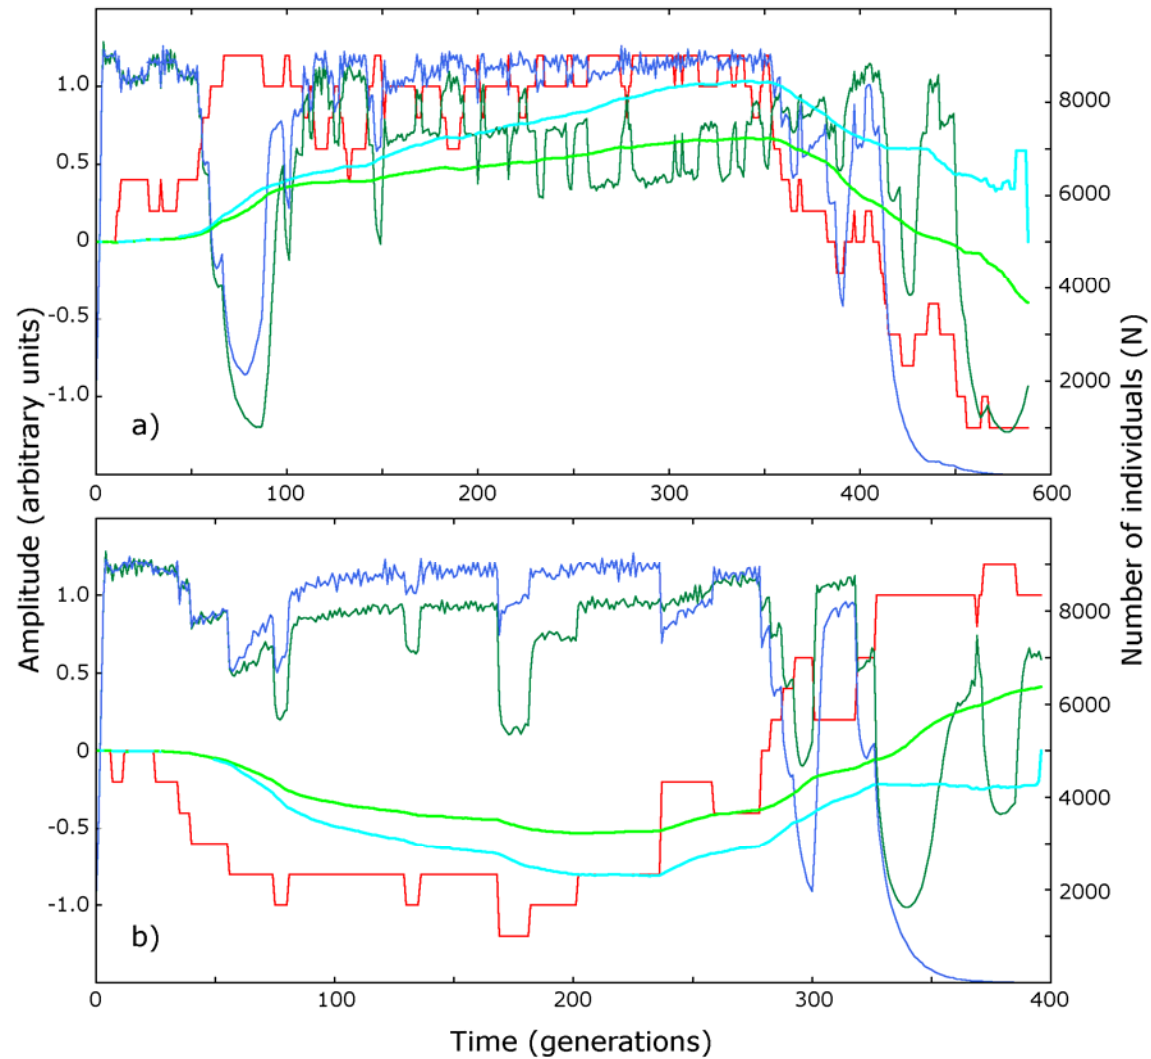

449

450 Fig. 2 Competition of evolutionarily plastic and elastic species under aperiodically changing  
451 conditions

452 The conditions (the variable temperature - the red line) changes either continuously (the upper part  
453 a) or discontinuously (lower part b). The dark blue, dark green, turquoise and light lines show the size  
454 of plastic species, size of elastic species, mean phenotype ( $E$ ) of elastic species and mean phenotype  
455 of plastic species, respectively.

456

457



458

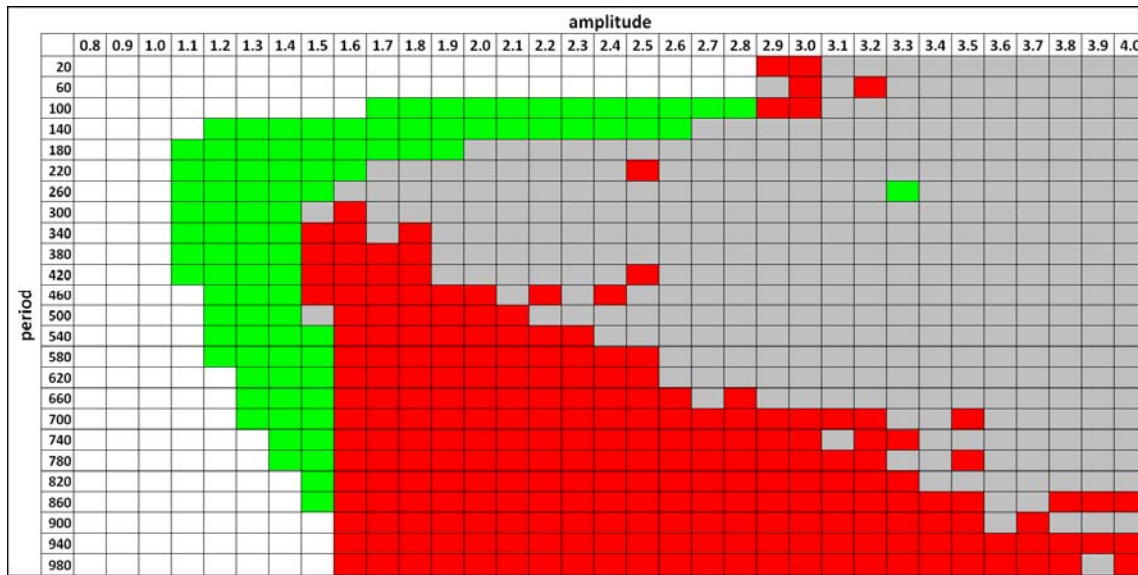

459

460 Fig. 3. Competition of the plastic and elastic species in various parts of the parameter space under  
461 periodically and continuously changing conditions

462 The green area denote combinations of amplitude and periods of environmental changes in which the  
463 evolutionarily elastic species win significantly more often (two sided goodness of fit test,  $p < 0.05$ ),  
464 the red area the combinations in which the evolutionarily plastic species win significantly more often,  
465 the gray area the combinations in which the difference in survival for both species was not significant,  
466 and the white area the combinations in which both species usually survive until the end of simulation  
467 experiment, i.e. for 10,000 generations.

468

469

470

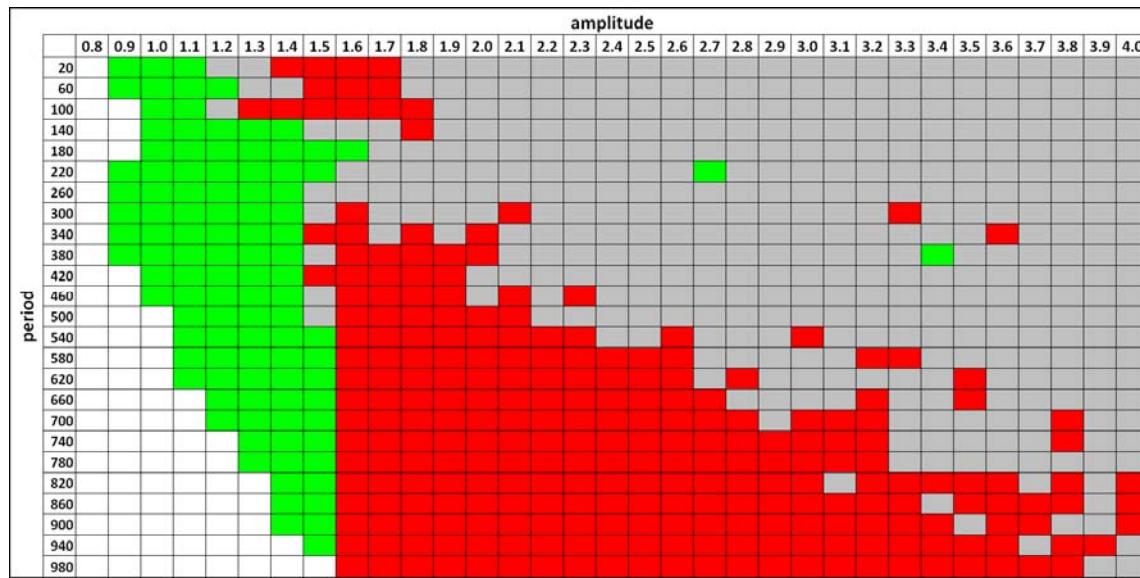

471

472 Fig. 4. Competition of the plastic and elastic species in various parts of the parameter space under  
473 periodically and discontinuously changing conditions

474 For the legend see the Fig. 3

475

476

477

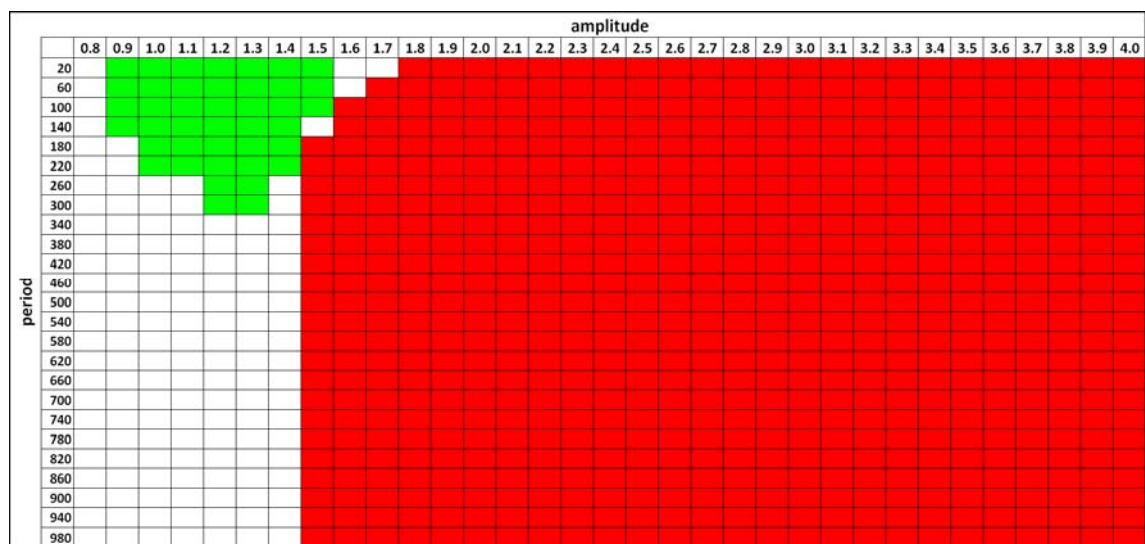

478

479 Fig. 5. Competition of the plastic and elastic species in various parts of the parameter space under  
480 aperiodically and continuously changing conditions.

481 For the legend see the Fig. 3

482

483

484

485

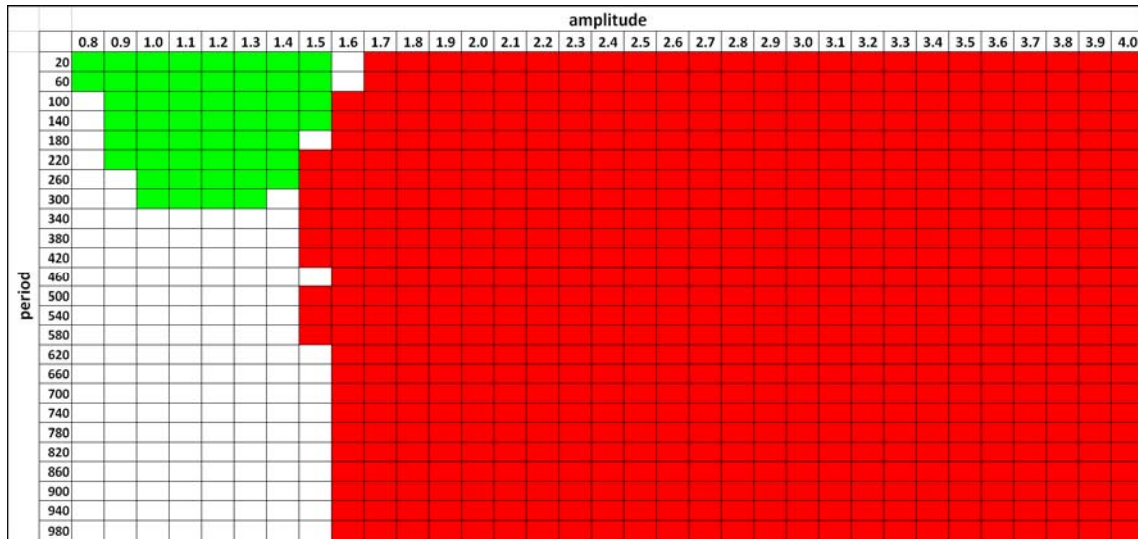

486

487 Fig. 6. Competition of the plastic and elastic species in various parts of the parameter space under  
488 aperiodically and discontinuously changing conditions.

489 For the legend see the Fig. 3

490

491

492

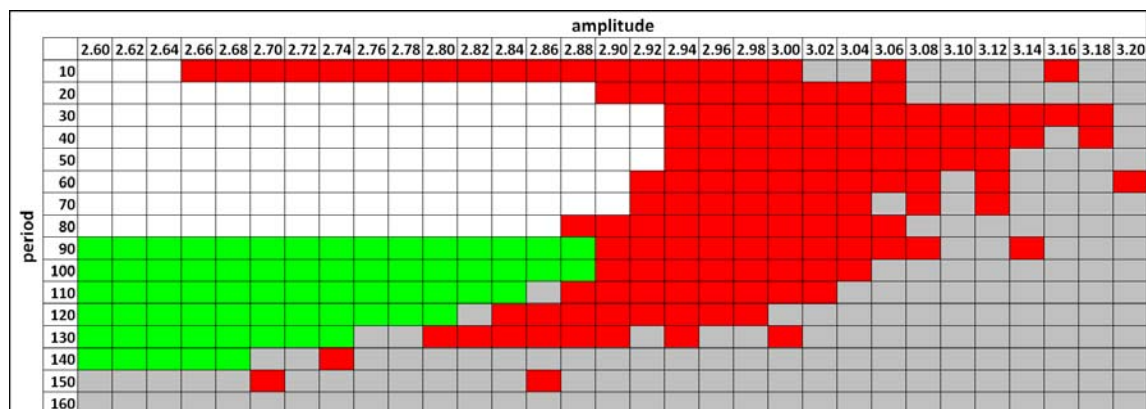

493

494 Fig. 7. Competition of the plastic and elastic species in the short period-large amplitude region of the  
495 parameter space under periodically and continuously changing conditions.

496 For the legend see the Fig. 3

497

498 List of Legends

499 Fig. 1 Competition of evolutionarily plastic and elastic species under periodically changing conditions

500 The conditions (the variable temperature - the red line) changes either continuously (the upper part  
501 a) or discontinuously (lower part b). The dark blue, dark green, turquoise and light lines show the size  
502 of plastic species, size of elastic species, mean phenotype ( $E$ ) of elastic species and mean phenotype  
503 of plastic species, respectively.

504

505 Fig. 2 Competition of evolutionarily plastic and elastic species under aperiodically changing  
506 conditions

507 The conditions (the variable temperature - the red line) changes either continuously (the upper part  
508 a) or discontinuously (lower part b). The dark blue, dark green, turquoise and light lines show the size  
509 of plastic species, size of elastic species, mean phenotype ( $E$ ) of elastic species and mean phenotype  
510 of plastic species, respectively.

511

512 Fig. 3. Competition of the plastic and elastic species in various parts of the parameter space under  
513 periodically and continuously changing conditions

514 The green area denote combinations of amplitude and periods of environmental changes in which the  
515 evolutionarily elastic species win significantly more often (two sided goodness of fit test,  $p < 0.05$ ),  
516 the red area the combinations in which the evolutionarily plastic species win significantly more often,  
517 the gray area the combinations in which the difference in survival for both species was not significant,  
518 and the white area the combinations in which both species usually survive until the end of simulation  
519 experiment, i.e. for 10,000 generations.

520

521 Fig. 4. Competition of the plastic and elastic species in various parts of the parameter space under  
522 periodically and discontinuously changing conditions

523 For the legend see the Fig. 3

524

525 Fig. 5. Competition of the plastic and elastic species in various parts of the parameter space under  
526 aperiodically and continuously changing conditions.

527 For the legend see the Fig. 3

528

529 Fig. 6. Competition of the plastic and elastic species in various parts of the parameter space under  
530 aperiodically and discontinuously changing conditions.

531 For the legend see the Fig. 3

532

533 Fig. 7. Competition of the plastic and elastic species in the short period-large amplitude region of the  
534 parameter space under periodically and continuously changing conditions.

535 For the legend see the Fig. 3

536
